# Supplementary material for: Characteristics of Free Amino Acids (the Quality Chemical Components of Tea) under Spatial Heterogeneity of Different Nitrogen Forms in Tea (Camellia sinensis) Plants
Source: PubMed Central journal article supplement (PMC6385162; doi:10.3390/molecules24030415), 2019-01-24
Supplement: molecules-24-00415-s001.pdf [file molecules-24-00415-s001.pdf]

***Supplementary Material:***

**Characteristics of Free Amino Acids (the Quality Chemical Components of Tea) under Spatial Heterogeneity of Different Nitrogen Forms in Tea (*Camellia sinensis*) Plants**

**Li Ruan<sup>1,2</sup>, Kang Wei<sup>1</sup>, Liyuan Wang<sup>1\*</sup>, Hao Cheng<sup>1\*</sup>, Liyun Wu<sup>1</sup> and Hailin Li<sup>1</sup>**

<sup>1</sup> National Center for Tea Improvement, Tea Research Institute, Chinese Academy of Agricultural Sciences, Hangzhou 310008, China; ruanli@tricaas.com; weikang@tricaas.com; wangly@tricaas.com; chenghao@tricaas.com; wuly@tricaas.com; lihailin@tricaas.com

<sup>2</sup> State Key Laboratory of Soil and Sustainable Agriculture, Institute of Soil Science, Chinese Academy of Sciences, Nanjing, 210008, China; ruanli@tricaas.com

\* Correspondence: chenghao@tricaas.com; Tel.: +86-0571-86653169 (H.C.)  
wangly@tricaas.com; Tel.: +86-0571-86650575 (L.Y.W)

**Figure S1.** A chromatogram of the free amino acids (FAAs). Three graphs in each column represent three biological duplications in one treatment. The numbers on each peak represented the following FAAs: 1-Aspartic acid, 2-Serine, 3-Glutamic acid, 4-Glycine, 5-Histidine, 6-Arginine, 7-Threonine, 8-Alanine, 9-Proline, 10-Theanine, 11-Cysteine, 12-Tyrosine, 13-Valine, 14-Methionine, 15-Lysine, 16-Isoleucine, and 17-Leucine.

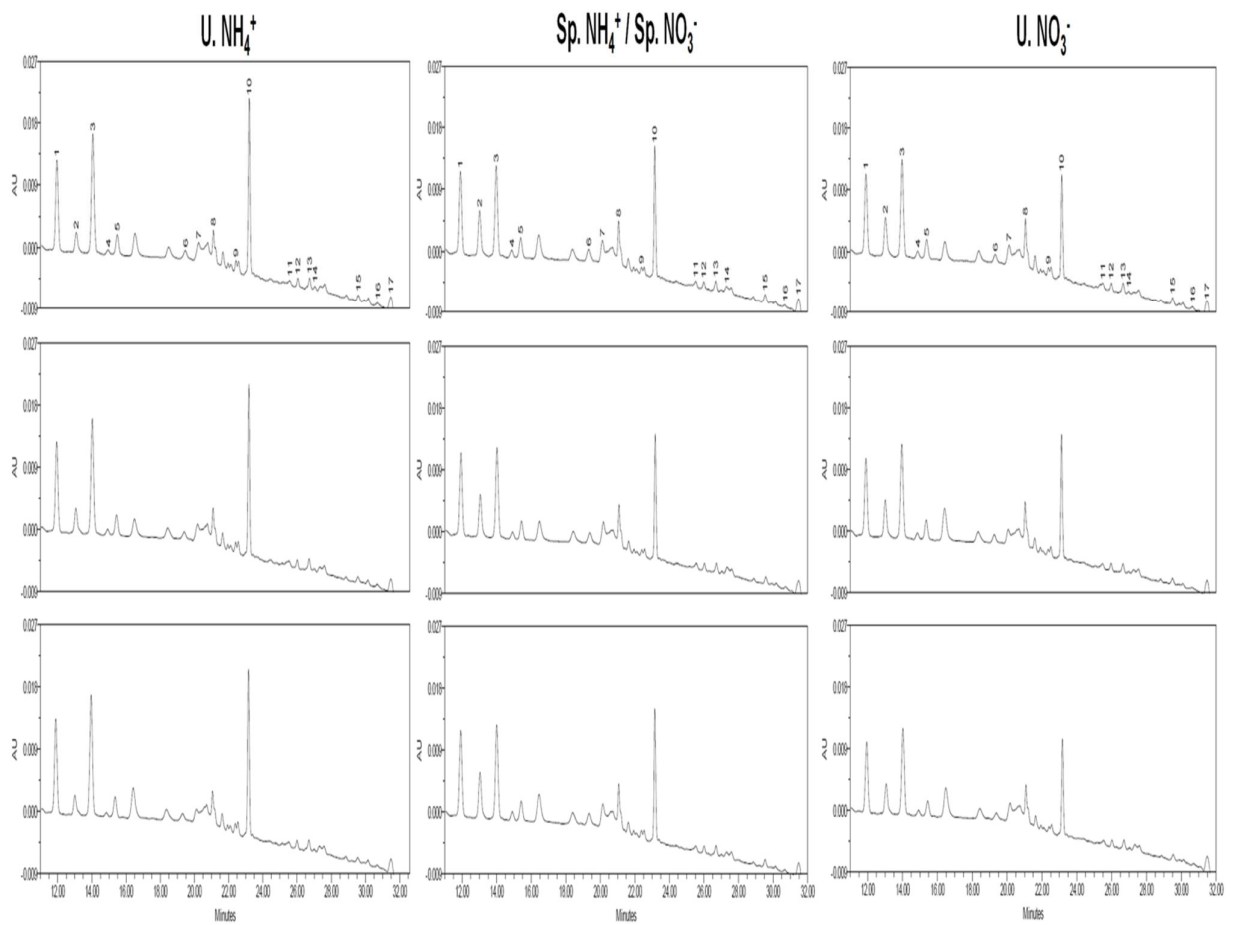

**Table S1.** The elution procedure in the experiment.

| <b>Time (min)</b> | <b>A%</b> | <b>B%</b> | <b>C%</b> |
|-------------------|-----------|-----------|-----------|
| 0                 | 100       | 0         | 0         |
| 0.5               | 99        | 1         | 0         |
| 18                | 95        | 5         | 0         |
| 19                | 91        | 9         | 0         |
| 29.5              | 83        | 17        | 0         |
| 33                | 0         | 60        | 40        |
| 36                | 100       | 0         | 0         |
| 45                | 100       | 0         | 0         |

**Table S2.** Quality control of the results.

| <b>Free amino acid</b> | <b>RSDs of retention time (%)</b> | <b>RSDs of peak area (%)</b> |
|------------------------|-----------------------------------|------------------------------|
| Aspartic Acid          | 0.203782                          | 2.397479                     |
| Serine                 | 0.183831                          | 1.977028                     |
| Glutamic Acid          | 0.153178                          | 1.375442                     |
| Glycine                | 0.153938                          | 2.696006                     |
| Histidine              | 0.164164                          | 4.155897                     |
| Arginine               | 0.168887                          | 3.191873                     |
| Threonine              | 0.108757                          | 0.78225                      |
| Alanine                | 0.059992                          | 1.875245                     |
| Proline                | 0.012876                          | 1.620989                     |
| Theanine               | 0.021654                          | 3.333748                     |
| Tyrosine               | 0.065038                          | 2.426868                     |
| Cysteine               | 0.056555                          | 2.638419                     |
| Valine                 | 0.069121                          | 2.338318                     |
| Methionine             | 0.070099                          | 2.210049                     |
| Lysine                 | 0.067266                          | 3.103045                     |
| Isoleucine             | 0.073026                          | 2.444326                     |
| Leucine                | 0.074638                          | 2.551925                     |
